# Supplementary material
Source: publisher figshare collection journal article supplement (https://acs.figshare.com/ndownloader/files/34171424)
Supplement: Supplementary file [file 34171424]

## Supporting Information

### Theoretical Insights into the Hydrogen Evolution Reaction on VGe<sub>2</sub>N<sub>4</sub> and NbGe<sub>2</sub>N<sub>4</sub> Monolayers

Mihir Ranjan Sahoo<sup>1</sup>, Avijeet Ray<sup>2</sup>, Nirpendra Singh<sup>3\*</sup>

<sup>1</sup>Harish-Chandra Research Institute, Prayagraj, India-211019

<sup>2</sup> Department of Physics, Indian Institute of Technology Roorkee, Roorkee-247667, India

<sup>3</sup>Departemnt of Physics and Center for catalysis and separation (CeCaS), Khalifa University of Science and Technology, Abu Dhabi 127788, United Arab Emirates

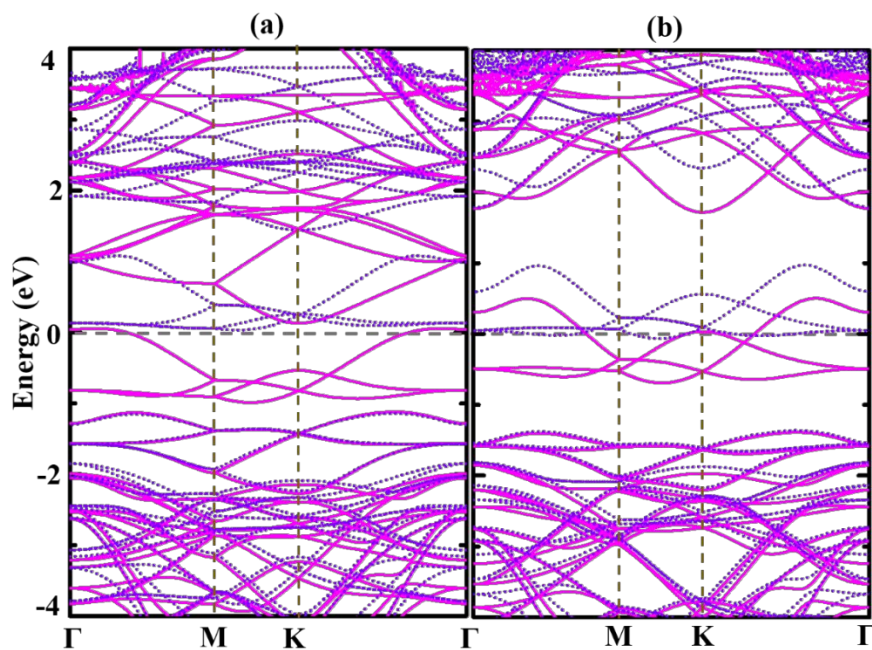

**Figure S1** The band structure of (a) VGe<sub>2</sub>N<sub>4</sub> and (b) NbGe<sub>2</sub>N<sub>4</sub> monolayers within PBE functional. Spin-up and spin-down bands are represented by solid magenta and dotted violet lines respectively.

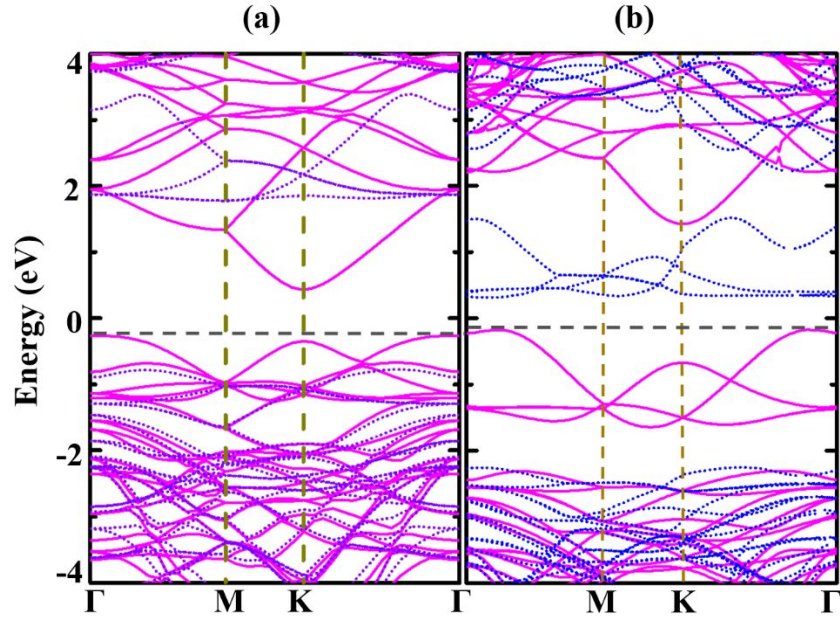

**Figure S2** HSE band structure of (a)  $\text{VGe}_2\text{N}_4$  and (b)  $\text{NbGe}_2\text{N}_4$  monolayers. Spin-up and spin-down bands are represented by solid magenta and dotted violet lines respectively.

**Table S1** The values of band gaps for  $\text{VGe}_2\text{N}_4$  and  $\text{NbGe}_2\text{N}_4$  monolayers for different  $U$  and HSE functional. Up, down, and total indicate the value for spin-up, spin-down, and total band gaps. For  $\text{VGe}_2\text{N}_4$  and  $\text{NbGe}_2\text{N}_4$ , the HSE total band gap matches with  $U=4.5$  eV and  $U=4$  eV respectively.

| U (eV) | Band Gap (eV)            |      |       |                           |      |       |
|--------|--------------------------|------|-------|---------------------------|------|-------|
|        | $\text{VGe}_2\text{N}_4$ |      |       | $\text{NbGe}_2\text{N}_4$ |      |       |
|        | Up                       | Down | Total | Up                        | Down | Total |
| 2      | 0.01                     | 1.64 | 0.01  | 0.01                      | 1.64 | 0.01  |
| 3      | 0.02                     | 1.82 | 0.02  | 1.15                      | 1.77 | 0.24  |
| 3.5    | 0.26                     | 1.88 | 0.26  | 1.14                      | 1.82 | 0.33  |
| 4      | 0.49                     | 1.95 | 0.49  | 1.12                      | 1.87 | 0.44  |
| 4.5    | 0.67                     | 2.10 | 0.67  | 1.07                      | 1.90 | 0.55  |
| 5      | 0.63                     | 2.03 | 0.63  | 0.89                      | 1.95 | 0.62  |
| HSE    | 0.69                     | 2.55 | 0.69  | 1.56                      | 2.57 | 0.48  |

**Table S2** The adsorption Hydrogen Gibbs free energy  $\Delta G_{H^*}$  for N-vacancy  $VGe_2N_4$  surface doped by different atoms.

| Doped atom<br>(X) | $\Delta G_{H^*}$ (eV) at different Position of H |            |           |
|-------------------|--------------------------------------------------|------------|-----------|
|                   | H above N                                        | H above Ge | H above X |
| <b>B</b>          | -0.95                                            | -1.60      | -1.60     |
| <b>C</b>          | -1.04                                            | -2.31      | -2.31     |
| <b>O</b>          | 0.72                                             | 2.46       | 1.74      |
| <b>P</b>          | -0.38                                            | 1.24       | 1.29      |
| <b>S</b>          | 0.71                                             | 1.30       | 1.44      |

### Structural, electronic and catalytic properties of P-doped $NbGe_2N_4$

Optimized structure of P atom doped at the N-vacancy of the monolayer is shown in the Figure S3 (a) and (b). The P atom is situated slightly above the outermost layer formed by N atoms. The optimized N-P bond length is found to be 2.27 Å. To check the HER activity of the doped surface in the basal plane, we have considered three different sites for hydrogen adsorption: (i) above N (H\_N), (ii) above P (H\_P) and (iii) above Ge (H\_Ge) atom. Among the three different sites, for H\_Ge case, a large positive value for binding energy obtained implying there is no interaction between H and the doped surface. Through Bader, we have found that there is almost no charge transfer between H and surface. Hence we have not proceeded further for details calculations of Ge site. When H is placed above N atom, the binding energy is found to be -0.13 eV whereas for P site, the value is equal to 0.42 eV. Thus  $\Delta G_{H^*}$  values are 0.11 eV and 0.66 eV for N and P sites respectively. This indicates that N site can be considered an active site for HER. The equivalent H-N and H-P bond length was found to be 1.02 Å and 1.42 Å respectively. To get more insight, we have calculated the amount of charge transfer between H atom and the doped-surface through Bader charge analysis. For case of N-site, a considerable amount of charge transfer (0.49e) from H whereas a small charge (0.28e) is transferred towards H for P-site. The charge density difference diagrams for both the sites are shown in Figure S3 (c) and (d) to understand the charge

redistribution after H adsorption. In case N-site (Figure S3 (c)), a large charge depletion region is observed around H atom and some of the charges are accumulated near the Nb atoms just below it. But the scenario is different in case of P-site as a small amount of charge get accumulated near H indicating very weak interaction (Figure S3 (d)). Further, we have plotted projected density of states (PDOS) of doped monolayer and H-adsorbed above the doped-monolayer (Figure S4) to reveal the electronic structure of H adsorption at different sites. The changes in the DOS near the Fermi level are clearly observed due to H adsorption (Figure S4 (b) and (c)).

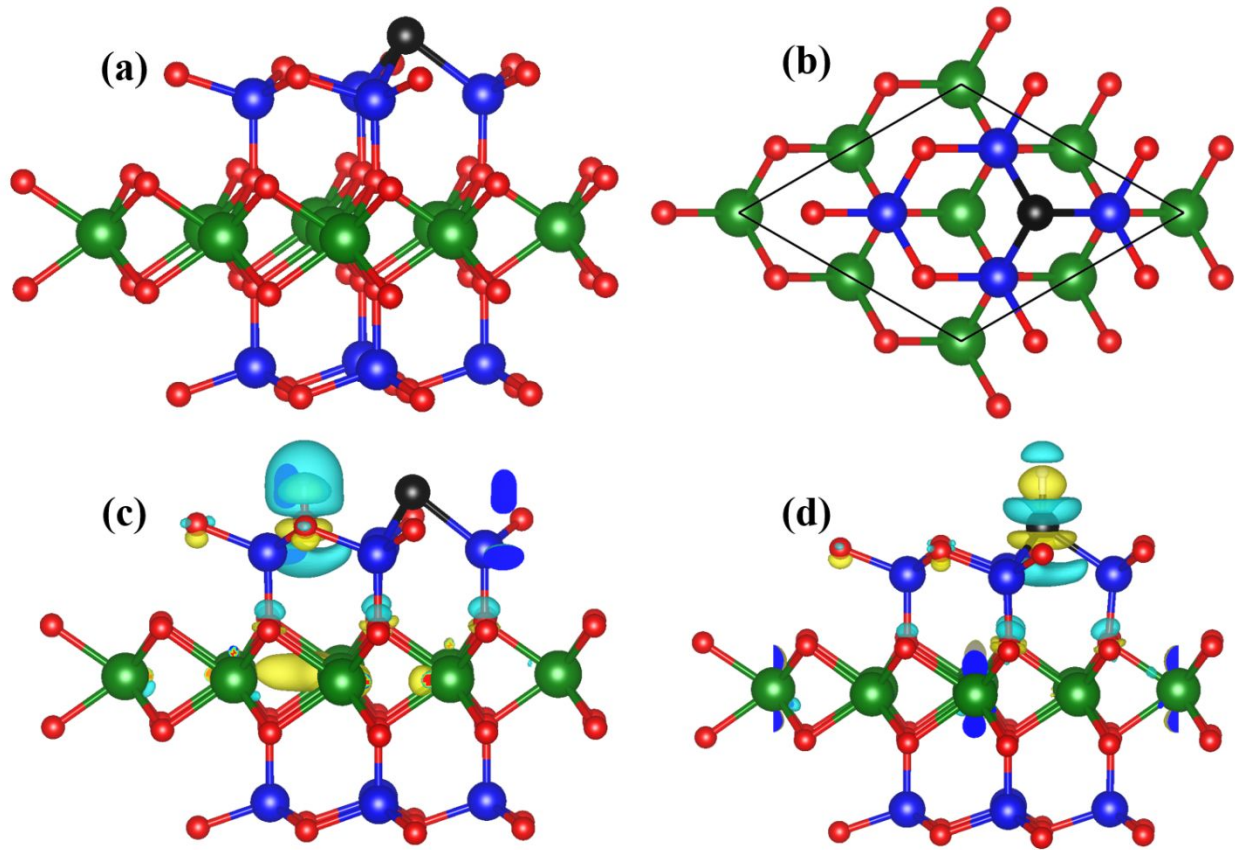

**Figure S3** Optimized structure (a) side (b) top view of P-doped NbGe<sub>2</sub>N<sub>4</sub> monolayer. The charge density difference for (c) H adsorbed above N atom (d) H adsorbed above P atom of the doped monolayer (iso-surface = 0.005 e/Å<sup>3</sup>). Nb, Ge, N, C and H atoms are represented by green, blue, red, black and white spheres, respectively. Here P atom is doped in place of N-vacancy of the monolayer. The charge accumulation and depletion regions are represented by yellow and cyan colors, respectively.

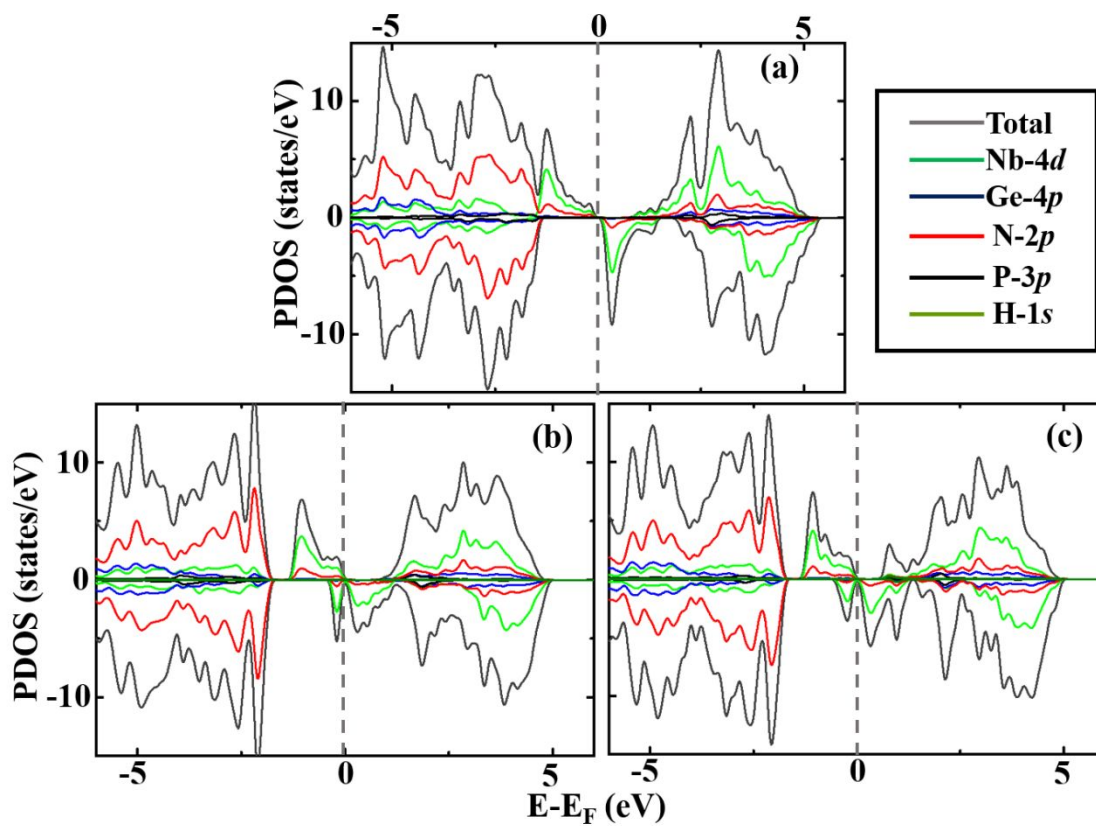

**Figure S4** Projected density of states (PDOS) of (a) P-doped at N-vacancy of NbGe<sub>2</sub>N<sub>4</sub> monolayer (b) H-adsorbed at N-site (c) H-adsorbed at P-site. Fermi level is set at 0 eV.



Electronic structures under biaxial strains:

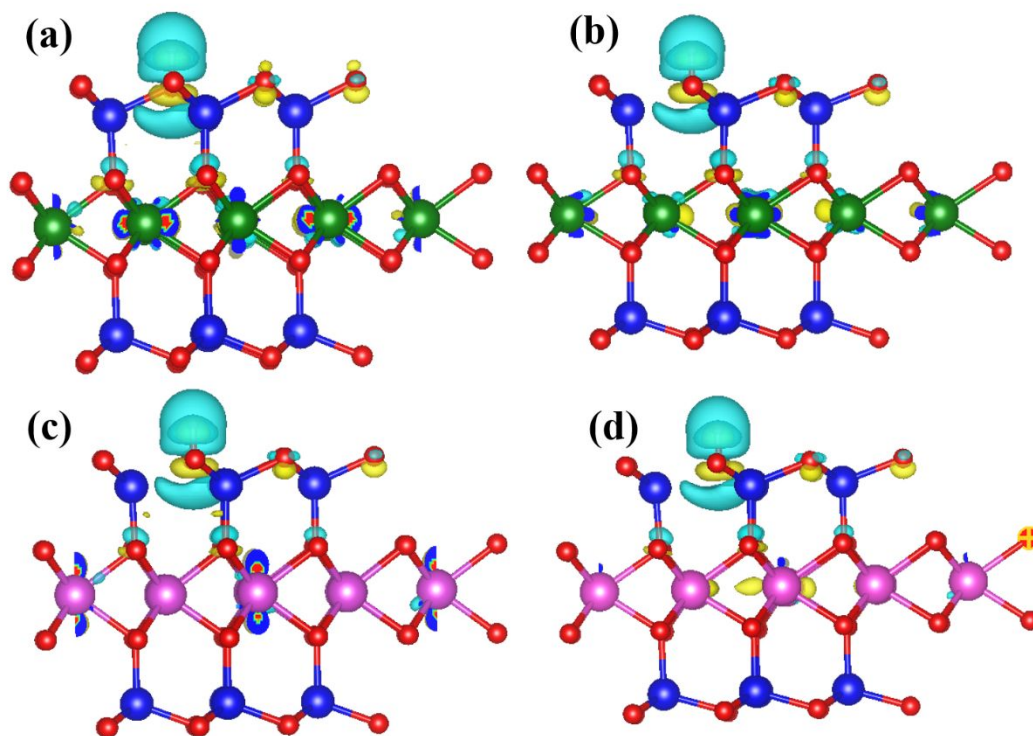

**Figure S5** Three-dimensional charge density difference plots for VGe<sub>2</sub>N<sub>4</sub> at (a) -3 % (b) +3% strains (upper panel), for NbGe<sub>2</sub>N<sub>4</sub> monolayers at (c) -3% and (d) +3% strain (lower panel). V, Nb, Ge, and N atoms are represented by green, magenta, blue, and red spheres respectively. (Iso-surface is 0.005 e/Å<sup>3</sup>). Yellow and cyan color represent electron accumulation and depletion regions respectively.

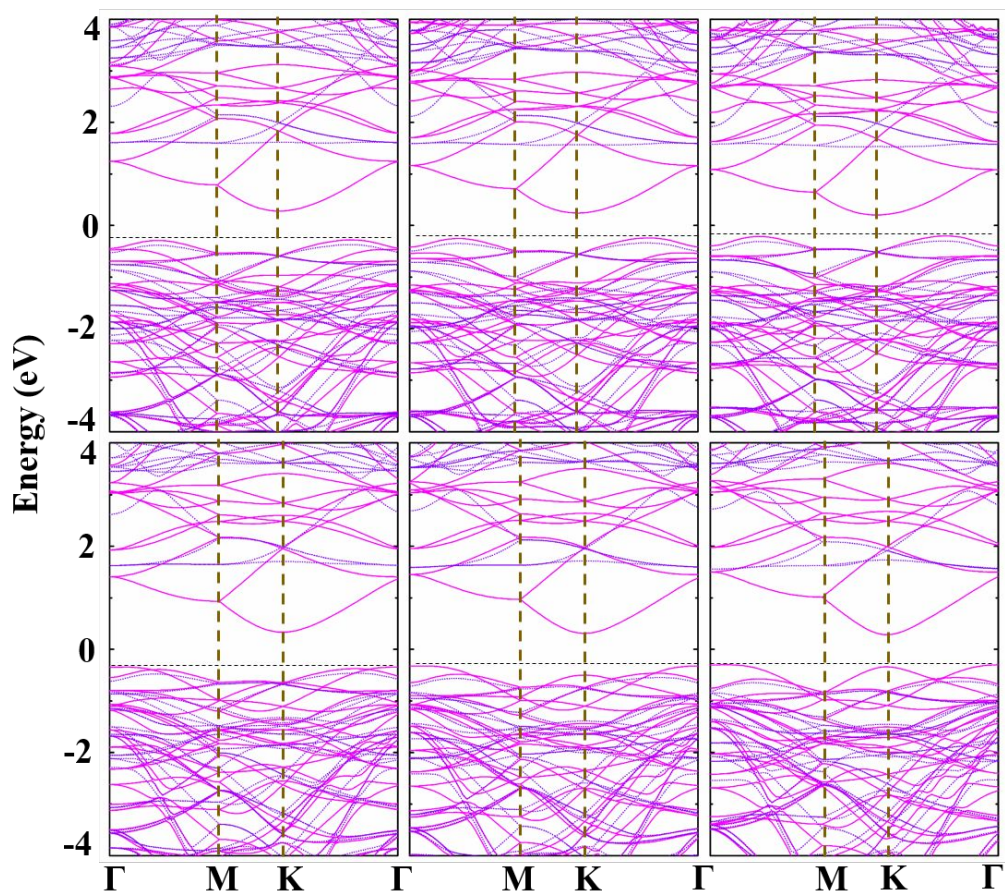

**Figure S6** Electronic band structures of VGe<sub>2</sub>N<sub>4</sub> monolayer under biaxial strains. Upper panel represents the bands under tensile strains from 1% to 3% while going from left to right. Lower panel represents the bands under compressive strains from -1% to -3% while going from left to right.

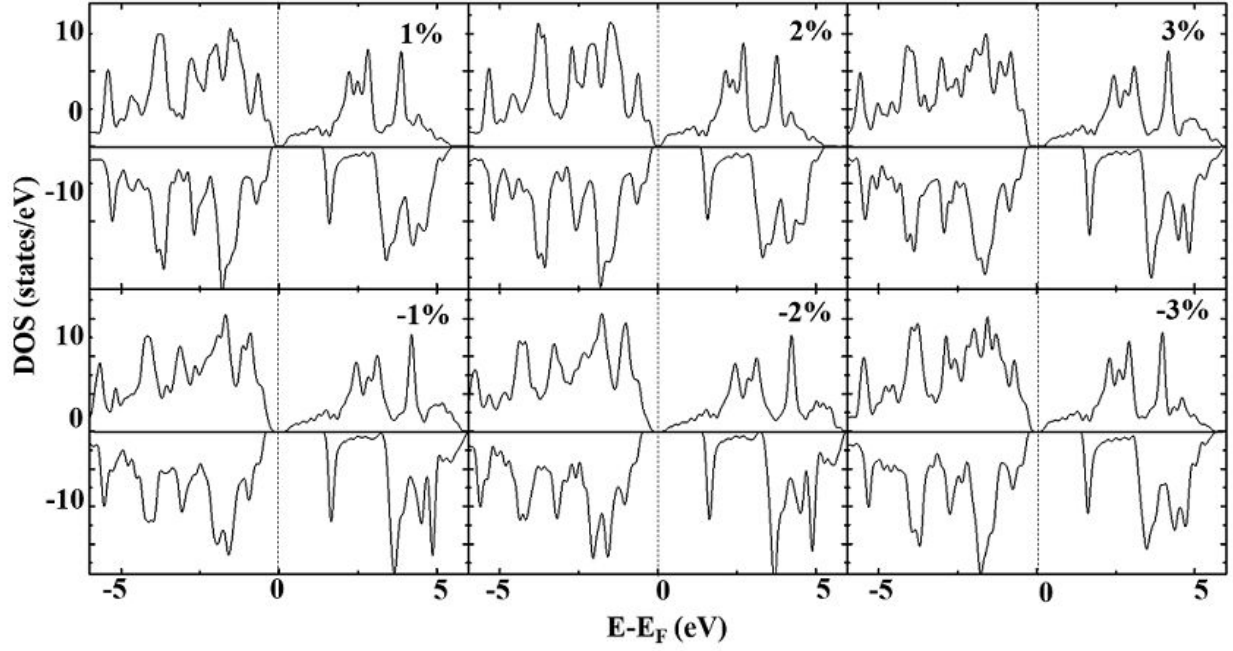

**Figure S7** Total density of states (DOS) of  $\text{VGe}_2\text{N}_4$  monolayer under biaxial strains. Upper panel (tensile strains) and lower panel (compressive strains).

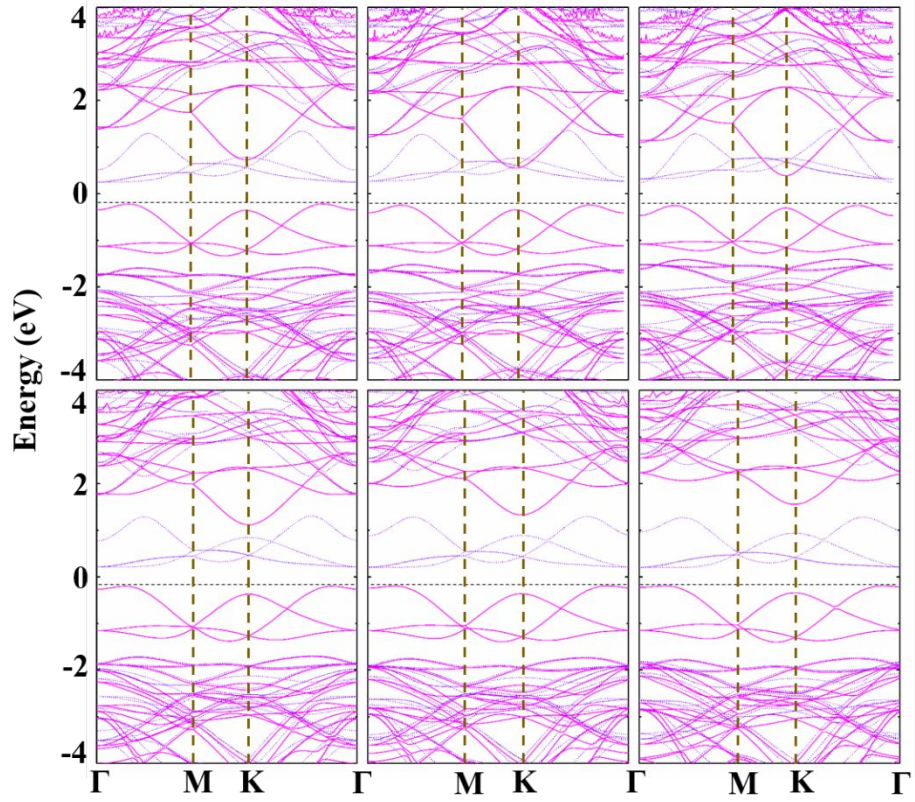

**Figure S8** Electronic band structures of  $\text{NbGe}_2\text{N}_4$  monolayer under biaxial strains. Upper panel represents the bands under tensile strains from 1% to 3% while going from left to right. Lower



panel represents the bands under compressive strains from -1% to -3% while going from left to right.

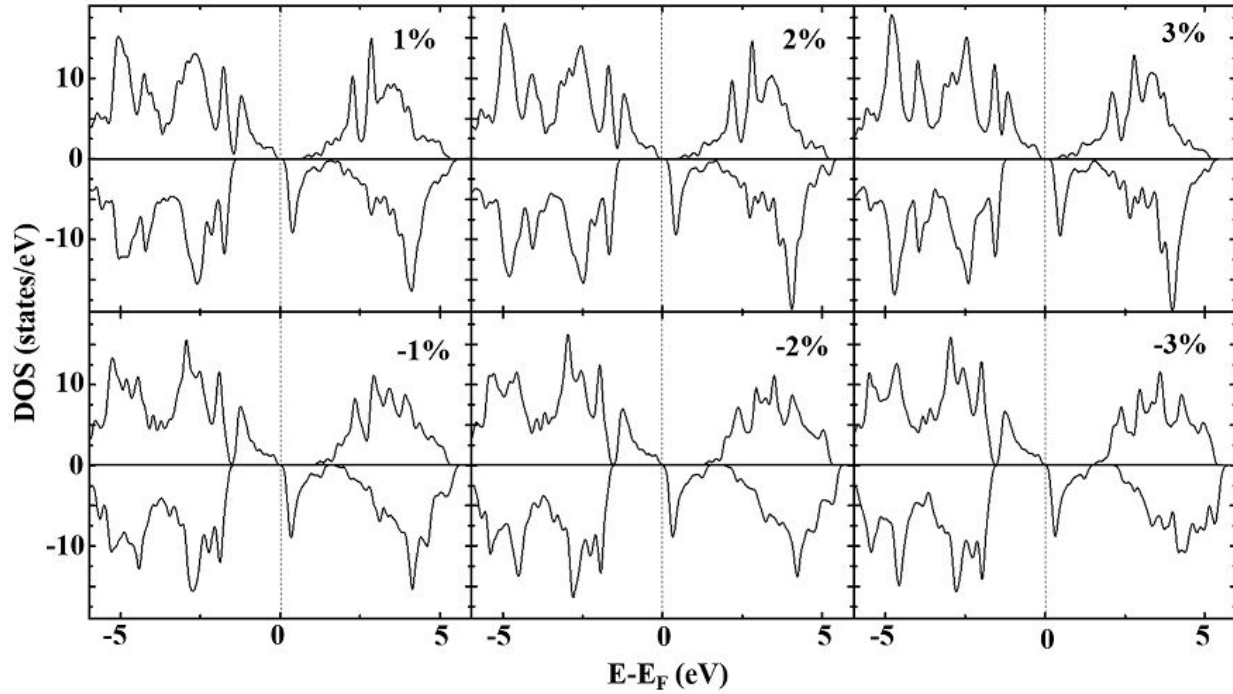

**Figure S9** Total density of states (DOS) of NbGe<sub>2</sub>N<sub>4</sub> monolayer under biaxial strains. Upper panel (tensile strains) and lower panel (compressive strains)

**Table S3** The values of band gaps for VGe<sub>2</sub>N<sub>4</sub> and NbGe<sub>2</sub>N<sub>4</sub> monolayers for different biaxial strains. Up, down, and total indicate the value for spin-up, spin-down, and total band gaps.

| Strain (%) | Band Gap (eV)                   |      |       |                                  |      |       |
|------------|---------------------------------|------|-------|----------------------------------|------|-------|
|            | VGe <sub>2</sub> N <sub>4</sub> |      |       | NbGe <sub>2</sub> N <sub>4</sub> |      |       |
|            | Up                              | Down | Total | Up                               | Down | Total |
| 1          | 0.56                            | 1.96 | 0.56  | 0.95                             | 1.82 | 0.47  |
| 2          | 0.48                            | 1.89 | 0.48  | 0.79                             | 1.77 | 0.51  |
| 3          | 0.40                            | 1.82 | 0.40  | 0.63                             | 1.63 | 0.49  |
| -1         | 0.67                            | 2.08 | 0.67  | 1.31                             | 1.90 | 0.41  |
| -2         | 0.63                            | 2.13 | 0.63  | 1.52                             | 1.92 | 0.40  |
| -3         | 0.58                            | 2.17 | 0.58  | 1.74                             | 1.93 | 0.39  |
